# Supplementary material
Source: HighWire-hosted journal article supplement (http://bmjopenquality.bmj.com/highwire/filestream/145930/field_highwire_adjunct_files/1/bmjoq-2022-002035supp002_data_supplement.pdf)

## Hyperemesis væskebehandling

Dejligt du vil prøve med væskebehandling hjemme.

Det er vigtigt, at du ringer, hvis du er i tvivl om det mindste.

Telefon XXX

1. Væsken klargøres – Infusionsslangen kobles til væsken, og slangen fyldes ved at trykke på filteret for dermed få væsken ned i filteret. Rulleklemmen åbnes så hele slangen fyldes og lukkes, når slangen er helt fyldt.
2. Membran sprittes af med spritserviet.
3. 2 ml heparin trækkes ud og derefter skylles med 10 ml saltvand.
4. Nu kan væsken kobles til, og derefter åbnes for rulleklemmen, så væsken drypper.
5. Når væsken er løbet ind, kobles denne fra.
6. Hvis nødvendigt trækkes 2 ml Ondansetron op og gives direkte efter. Herefter skyller du med 10 ml saltvand.
7. To ml heparin trækkes op og indgives.
8. Åbnet heparin sættes på køl og kan så holde sig 24 timer. Efter 24 timer kasseres denne i den gule kanyle boks.
9. Hvis du oplever komplikationer, eller noget ikke er som det skal være (f.ekds. tegn på infektion), skal du kontakte os omgående.

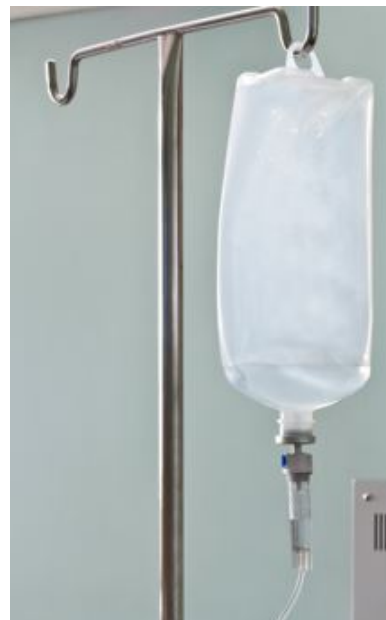

Supplement: bmjoq-2022-002035supp002_data_supplement.pdf [file bmjoq-2022-002035supp002_data_supplement.pdf]
